# Supplementary material for: Separable, Ctf4-mediated recruitment of DNA Polymerase α for initiation of DNA synthesis at replication origins and lagging-strand priming during replication elongation
Source: PubMed Central journal article supplement (PMC7237047; doi:10.1371/journal.pgen.1008755), 2020-05-07

**Porcella et al., Figure S5, associated with Figure 3**

**2D gels: Replicate 2**

0.05% Gal

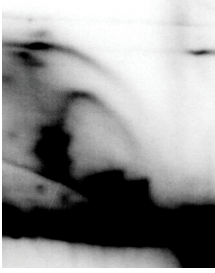

0.005% Gal

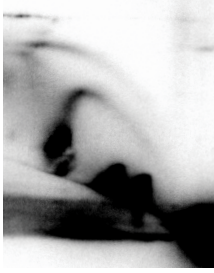

Supplement: pgen.1008755.s005.pdf [file pgen.1008755.s005.pdf]
