# Supplementary material for: Separable, Ctf4-mediated recruitment of DNA Polymerase α for initiation of DNA synthesis at replication origins and lagging-strand priming during replication elongation
Source: PubMed Central journal article supplement (PMC7237047; doi:10.1371/journal.pgen.1008755), 2020-05-07

### A. *GDPOL1-4A*

OEMs separated by forkhead status

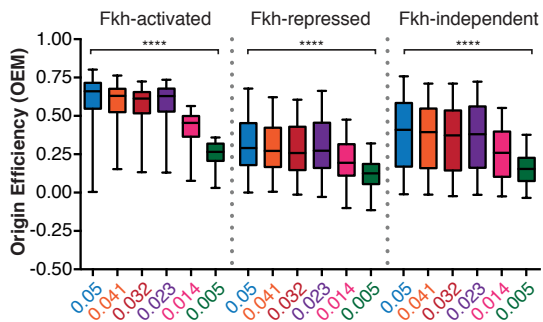

OEMs separated by timing

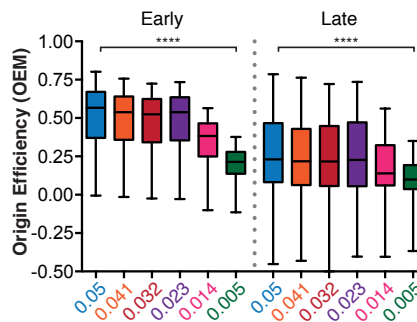

### B. *GDPOL1; ctf4Δ*

OEMs separated by forkhead status

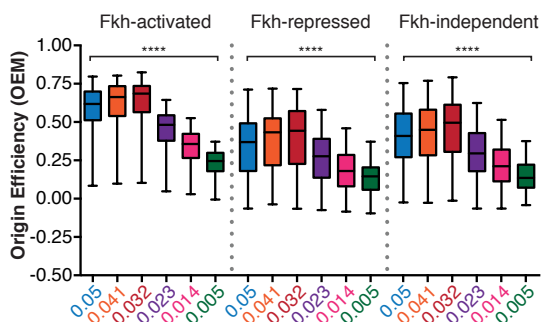

OEMs separated by timing

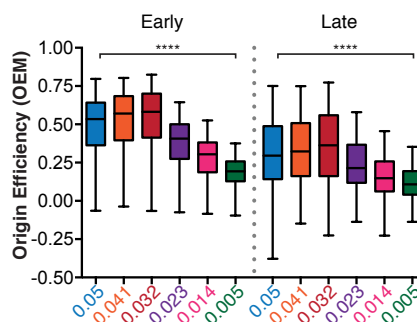

### C. WT

OEMs separated by forkhead status

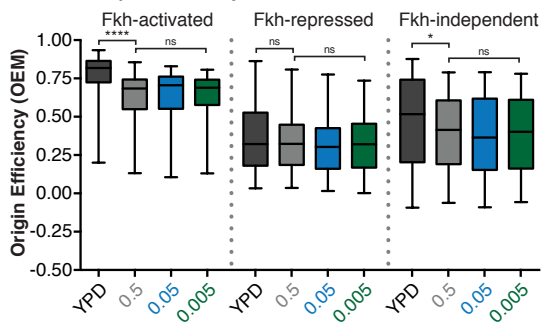

OEMs separated by timing

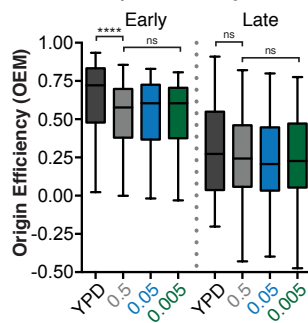

Supplement: pgen.1008755.s008.pdf [file pgen.1008755.s008.pdf]
